# Supplementary material for: Haploinsufficiency of the essential gene Rps12 causes defects in erythropoiesis and hematopoietic stem cell maintenance
Source: eLife. 2023 Jun 5;12:e69322. doi: 10.7554/eLife.69322 (PMC10287158; doi:10.7554/eLife.69322)
Supplement: Figure 1—source data 1. [file elife-69322-fig1-data1.xlsx]

## Sheet: 1B
		Weight (g)
	Days (after birth)	RpS12 +/+								RpS12 KO/+
	5	2.6	2.4	2.9	3.1	3.2	3.4	3.5	3.1	1.6	1.6	2.1	2.3	2.1	2.2	2.5	2.6	1.4	2.2	2.6
	6	3.1	2.9	3.5	3.4	3.7	4.1	4.2	3.8	1.8	2	2.5	2.7	2.3	2.5	2.8	3	1.6	2.4	3.1
	7	4	3.3	3.9	3.8	4.2	4.6	4.6	4.1	1.9	2.2	2.7	2.7	2.7	2.7	3.3	3.3	1.5	2.9	3.6
	8	4.8	4.3	4.6	4.4	4.7	5.1	5.1	4.7	2.4	2.2	2.9	3	3.1	3.3	3.7	4	1.6	3.4	4
	9	5.2	4.6	5	4.8	5	5.2	5.2	4.8	3	2.5	2.8	3.3	3.3	3.4	4.2	4.3	1.6	3.5	4.1
	10	5.8	5.3	5.5	5.2	5.4	5.5	5.6	5.1	3.4	2.9	2.7	3.5	3.8	3.9	4.6	4.7	1.9	3.6	4.4
	11						5.8	6.1	5.4									1.9	3.7	4.9
	12						6	6.5	5.8									2.3	4.3	5.2
	13	7.3	7.1	6.8	6.6	6.7				5.2	4.5	3	4.8	5.2	5.2	5.9	6
	14	7.5	7.5	7.1	6.8	7.1	6.7	7	6.5	5.7	4.9	3.3	5.1	5.4	5.4	6.2	6.3	2.7	5	5.8
	15	7.9	7.7	7.3	7	7.1	6.8	7.2	6.8	6.1	5.1	3.5	5.1	5.6	5.7	6.3	6.3	2.8	5	5.9
	16	7.8	7.7	7.4	7.1	7.2	7.1	7.4	6.9	6	5.1	3.8	5.3	5.7	5.8	6.4	6.3	3	5.1	6
	17	7.8	7.7	7.7	7.3	7.3				6	5.2	3.8	5.3	5.9	5.9	6.5	6.4
	18	8.2	8.3	8.2	7.5	7.9	7.3	7.6	7.1	6.2	5.4	4	5.5	6	5.9	6.6	6.6	3.3	5.3	6.1
	19	8.6	8.8	8.9	8.1	8.8	8	8.1	7.5	6.5	5.8	4.1	5.5	6.3	6.4	7.1	7.2	3.5	5.5	6.4
	20	9.6	9.7	9.9	9.1	9.6				7.1	6.4	4.3	5.8	6.9	7.2	7.9	7.8
	21	10.6	10.3	10.8	10	10.5				7.5	7	4.8	6.4	7.4	7.8	8.5	8.4

## Sheet: 1F
		Genotype
	% of mice from each litter	RpS12 +/+	RpS12 KO/+
	With No Phenotype	100	66.6667
		100	100
		100	100
		100	0
		100	50
		100	100
		100	100
		100	100
		100	100
		100	100
		100	100
		100	100
		75	100
		100	100
		100	33.3333
		100	50
		100	100
		100	100
		100	0
		100	100
		100	100
		100	100
		100	50
		100	100
		100	50
		100	66.6667
		100	100
	With Hydrocephalus	0	33.3333
		0	0
		0	0
		0	100
		0	50
		0	0
		0	0
		0	0
		0	0
		0	0
		0	0
		0	0
		25	0
		0	0
		0	66.6667
		0	50
		0	0
		0	0
		0	100
		0	0
		0	0
		0	0
		0	50
		0	0
		0	50
		0	33.3333
		0	0

## Sheet: 1G
		Genotype
	Weeks	RpS12 +/+	RpS12 KO/+				1 = Dead mouse
	27.8571		1				0 = Live mouse
	1.28571		1
	3.14286		1
	63.5714		1
	7		1
	7		1
	89.5714		1
	37.8571		1
	65.5714		1
	10.2857		1
	9.42857		1
	5		1
	4.57143		1
	6.42857		1
	53.1429		1
	32		1
	44.5714		1
	40.5714		1
	10.8571		1
	5.42857		1
	54.2857		1
	5		1
	28.2857		0
	30.1429		0
	27.1429		0
	27.1429		0
	104.286		0
	27.1429		0
	94.4286		0
	30.7143		0
	94.4286		0
	30.5714		0
	30		0
	28.1429		0
	65		0
	27.8571		0
	85.8571		0
	85.8571		0
	82.5714		0
	74.4286		0
	74.4286		0
	55.5714		0
	72.2857		0
	72.2857		0
	72.2857		0
	70.2857		0
	67.7143		0
	67.7143		0
	67.7143		0
	67.7143		0
	67.7143		0
	67.7143		0
	67.7143		0
	35		0
	64.7143		0
	61.8571		0
	61.8571		0
	61.8571		0
	7		0
	58.1429		0
	51.1429	1
	51.8571	1
	6	1
	58	1
	5.14286	1
	54.1429	1
	46.1429	1
	104.286	0
	99.1429	0
	94.4286	0
	91.5714	0
	91.5714	0
	85.8571	0
	85.8571	0
	74.4286	0
	74.4286	0
	74.4286	0
	74.4286	0
	72.2857	0
	72.2857	0
	72	0
	70.2857	0
	70.2857	0
	70.2857	0
	70.2857	0
	67.7143	0
	67.7143	0
	67.7143	0
	67	0
	67	0
	67	0
	66.7143	0
	66.7143	0
	66.7143	0
	64.8571	0
	61.8571	0
	61.8571	0
	61.8571	0
	60.8571	0

## Sheet: 1J
	Embryo's Weight (mg)
	RpS12 +/+	RpS12 KO/+
	125	111
	101	108
	131	97
	118	90
	129	117
	124	132
	116	108
	124	96
	101	106
	106	93
