# Supplementary material for: Haploinsufficiency of the essential gene Rps12 causes defects in erythropoiesis and hematopoietic stem cell maintenance
Source: eLife. 2023 Jun 5;12:e69322. doi: 10.7554/eLife.69322 (PMC10287158; doi:10.7554/eLife.69322)
Supplement: Figure 2—source data 1. [file elife-69322-fig2-data1.xlsx]

## Sheet: 2A
	White Blood Cells (K/uL)			Red Blood Cells (M/uL)			Platelets (K/uL)			Mean Corpuscular Volume (fL)
	RpS12 +/+	RpS12 KO/+		RpS12 +/+	RpS12 KO/+		RpS12 +/+	RpS12 KO/+		RpS12 +/+	RpS12 KO/+
	6.14	3.9		10.63	8.29		623	538		40.6	39.5
	5.7	2.7		11.26	7.98		668	270		39.9	42.6
	5.32	2.88		10.85	8.8		686	401		39.8	42.7
	6.96	3.9		10.45	9.54		690	480		40.5	42.2
	6.58	6.08		11.55	8.15		820	567		40.3	40.8
	6.84	4.3		10.99	8.64		825	550		39.6	44.5
	7.52	2.9		10.8	8.94		714	435		40.3	39
	8.7	3.62		10.82	9.9		673	595		39.4	41.1
	5.88	5.84		10.87	8.62		737	425		39.2	42.9
	8.58	4.56		10.61	9.41		621	425		39.2	41.7
		4.48			9.48			477			42.7
		7.4			10.33			488			42
		5			9.68			499			42.8

## Sheet: 2C
		Erythroid Progenitos	RpS12 +/+				RpS12 KO/+
	% Of Bone Marrow Cells	I	2.09	2.53	2.59	1.25	0.89	1.5	1.44	0.89
		II	19.6	20.4	20.3	20.7	30.7	27.8	26.6	27.3
		III	2.51	2.4	2.37	2.62	3.4	6.39	3.7	3.01
		IV	27.8	31.6	18.7	19.3	20.1	17.7	19.6	20.9

## Sheet: 2D
		Erythroid Progenitos	RpS12 +/+				RpS12 KO/+
	% Of Bone Marrow Cells	I	0.35	0.43	2.5	0.27	0.34	1.6	1.63	0.67
		II	5.86	12.1	27.4	6	8.74	12.3	24.2	13.4
		III	1.37	1.2	2.15	1.74	2.2	1.89	2.46	2.04
		IV	88.2	84.8	66.5	91.5	87.9	83.3	70.4	83.2

## Sheet: 2E
		Erythroid Progenitos	RpS12 +/+					RpS12 KO/+
	% Of Bone Marrow Cells	I	0.99	0.95	1.04	1.4	1.32	5.05	1.21	3.34	1.97
		II	21.4	26.1	22.7	31.3	23.3	61.7	29.1	48.6	36
		III	2.71	2.93	2.32	2.51	2.83	4.31	6.86	3.86	5.07
		IV	73.7	68.8	72.6	63	71.3	25.6	61.2	41.1	54.7

## Sheet: 2F
		Erythroid Progenitos	RpS12 +/+					RpS12 KO/+
	% Of Bone Marrow Cells	I	3.31	1.35	2.58	2.05	1.9	2.84	5.41	3.2	2.85
		II	34.1	29.1	31.6	30.6	34.7	42.4	47.3	43.3	47.8
		III	4.84	6.38	4.03	5.26	3.24	13.5	10.8	11.7	9.57
		IV	29	24.1	23.9	20.3	24.9	21	14.9	12.4	22.8

## Sheet: 2G
	CFU-E (young)			BFU-E (young)			CFU-E (old)			BFU-E (old)
	RpS12 +/+	RpS12 KO/+		RpS12 +/+	RpS12 KO/+		RpS12 +/+	RpS12 KO/+		RpS12 +/+	RpS12 KO/+
	586	506		12	0		446	242		16	7
	504	485		11	0		406	340		12	6
	482	298		9	1		356	218		15	2
	552	304		12	0		378	206		18	0
	519	584		13	4		306	256		14	4
	549	536		16	2		350	272		13	1
		481			3			264			3
		548			1			224			2
