# Supplementary material for: Haploinsufficiency of the essential gene Rps12 causes defects in erythropoiesis and hematopoietic stem cell maintenance
Source: eLife. 2023 Jun 5;12:e69322. doi: 10.7554/eLife.69322 (PMC10287158; doi:10.7554/eLife.69322)
Supplement: Figure 3—figure supplement 1—source data 1. [file elife-69322-fig3-figsupp1-data1.xlsx]

## Sheet: Suppl F 2C
LT-HSC				ST-HSC					+/+				KO/+
+/+	KO/+			+/+	KO/+			MPP2	37.6	31	43.6	37.7	40		37.1	47.4
6.95	10			24	26.7			MPP3	31.5	34.5	25.8	30	23.3		24.7	22.1
12.7	8.99			21.8	29.2			MPP4	61	50.2	56.8	55	30.6		37.3	38
11.4	10.4			19.2	20.1			CMP	4.02	5.76	6.38	6.15	8.76		7.48	10.3
10.2				22				GMP	59.9	70.4	68	67.3	60		58.3	52.8
								MEP	34.2	20.5	22.5	24	28.6		31.3	33.4
								CLP	0.86	1.07	0.9	0.96	0.52		0.21	0.6

## Sheet: Suppl F 2D
				ST-HSC					+/+				KO/+
				+/+	KO/+			MPP2	1.86	1.67	1.19		6.93	13	13.9	7.97
				34.1	7.12			MPP3	49.7	56.8	61.8		59.7	71.2	66.6	76.9
				30.6	4.14			MPP4	71.1	78.7	78		44.4	87	52.2	90.8
				29.2	2.94			CMP	20.2	18	22.1		12.2	17.9	14.6	17.7
					6.9			GMP	29.7	21.1	31.3		42.3	53.1	39.6	46.4
								MEP	41.1	52.8	38		40.3	20.4	38.8	27.2
								CLP	9.58	11.6	7.6		2.05	1.53	5.1	2.79
