# Supplementary material for: Haploinsufficiency of the essential gene Rps12 causes defects in erythropoiesis and hematopoietic stem cell maintenance
Source: eLife. 2023 Jun 5;12:e69322. doi: 10.7554/eLife.69322 (PMC10287158; doi:10.7554/eLife.69322)
Supplement: Figure 3—figure supplement 2—source data 2. [file elife-69322-fig3-figsupp2-data2.xlsx]

## Sheet: Suppl F3A
	RpS12 mRNA fold change
	+/+	KO/+
	0.946551	0.594235
	0.892141	0.718834
	1.04334	0.804024
	1.135	0.73763

## Sheet: Suppl F3B
	snord100fold change			snora33 fold change
	+/+	KO/+		+/+	KO/+
	0.973687	0.498361		1.03574	0.664762
	0.929984	1.21357		0.894428	1.22035
	1.0549	1.29292		1.07421	1.37761
	1.04687	1.20446		1.00489	1.2364

## Sheet: Suppl 3C
	RpS12 / actin
	+/+	KO/+
	1.18015	0.631314
	0.962939	0.67845
	1.20338	0.779196
	0.653528	0.651118

## Sheet: Suppl 3D
	28S/18S
	+/+	KO/+
	2.6	2.8
	2.6	2.7
	2.7	2.4
	2.7	2.4
