# Supplementary material for: Haploinsufficiency of the essential gene Rps12 causes defects in erythropoiesis and hematopoietic stem cell maintenance
Source: eLife. 2023 Jun 5;12:e69322. doi: 10.7554/eLife.69322 (PMC10287158; doi:10.7554/eLife.69322)
Supplement: Figure 3—source data 1. [file elife-69322-fig3-data1.xlsx]

## Sheet: F 3B
	LT-HSC			ST-HSC
	+/+	KO/+		+/+	KO/+
	596.9	98.6		2057.4	262.8
	417.6	71.6		717.8	232.7
	524.8	146.4		883.2	283.7
	874.8			1883.3

## Sheet: F 3C
			+/+				KO/+
	Cells per femur	MPP2	3225.8	1017.9	2009.6	3219.8	394.2		295.4	668
		MPP3	2705.1	1135.4	1190.4	2563.7	230		196.9	311.1
		MPP4	10109.2	9383	12352	15539.9	3679.2		1727.4	2708.4
		CMP	6438.9	6707.7	8934.4	8760.2	2409		3911.2	5114.9
		GMP	95796.1	81914.9	95155.2	95912.1	16490.7		30528.5	26315.4
		MEP	54660.8	23829.3	31552	34165.8	7862.1		16369.6	16653
		CLP	8813.8	9291.6	10982.4	10048.1	5420.3		1539.4	4483.5

## Sheet: F 3D
	Total cell per femur
	+/+	KO/+
	12.7	10.95
	13.05	8.85
	12.8	8.95
	12.15	9.15
	13.8	9.05
	14.35	9.15
	9.15	10.7
	13.9	11.3
	11.2	10.6
	16.9	12.3

## Sheet: F 3E
	Spleen Weight (mg)
	+/+	KO/+
	86.4	65.7
	77.3	71.9
	108.6	59.9
	96	72.6
	86.3	62.4
	83.2	82.3
	74.2	74
	84.9	61.8
	84.9	64.9
	116.3	70.4

## Sheet: F 3F
	Total # HSCs per femur
	+/+	KO/+
	5263	1872.3
	3914.3	1339.2
	5164.5	937.2
		1125.4

## Sheet: F 3G
			+/+				KO/+
	Cells per femur	MPP2	235.5	191.3	203.5		450.3	1618.2	1079.2	1108.9
		MPP3	6301.8	6489.8	10595.1		3875	8872.2	5154.6	10707.9
		MPP4	14861.1	15108.8	12629.6		94.8	1674	340.8	5213.3
		CMP	26038	24059.3	31018.3		5237.7	17381.7	8108.2	24179.6
		GMP	38309.1	28177.5	43867		18130.5	51656.9	21924.8	63353.4
		MEP	53045.5	70418.3	53272.6		17301	19878.8	21527.2	37171.3
		CLP	10442.9	9970.5	10203.8		1185	1562.4	4799.6	3293.5

## Sheet: F 3H
	Cells per femur
	+/+	KO/+
	13.9	11.9
	12.8	14
	15.7	14.2
		16.6
		5.17
		5.1
		14
		12
		9.46

## Sheet: F 3I
	Spleen Weight (mg)
	+/+	KO/+
	91.5	60.9
	87.9	69.1
	110	62
	97.9	64.7
	74.8	68.8
	123.4	103.3
	86.2	69
	97.1	80.3
		76.6
		48
		59
		78
		54
		51

## Sheet: F 3J
	WBC			RBC			PLT			MCV
	+/+	KO/+		+/+	KO/+		+/+	KO/+		+/+	KO/+
	4.22	2.38		9.41	7.77		762	412		36.9	38.8
	5.86	1.44		9.75	8.89		716	524		37.2	39.5
	10.02	2.64		10.46	9.7		635	422		37.5	36.7
	9.26	1.74		9.65	9.13		598	486		38	35.8
	9.14	2.54		10.29	9.12		777	562		38.4	40.5
	9.28	2.88		10.43	8.63		697	670		41.9	43.6
	7.76	1.58		10.23	7.55		660	520		40.6	44.3
	11.16	9.04		10.89	9.28		470	627		40.9	43.1
		3.62			9.16			465			44.1
		3.1			10.35			447			42.2
		1.96			9.79			445			44.6

## Sheet: F 3K
			+/+										KO/+
	Colonies per plate	Round 1	60	47	38	42	28	34	32	26	83	69	7	14	17	17	33	18	37	34	24	18
		Round 2	79	74	154	163	72	66	94	91	54	61	61	72	102	75	58	54	120	126	81	103
		Round 3	4	6	62	48	43	37	1	0	39	22	1	1	0	1	21	16	3	5	0	3
		Round 4	19	25	1								0	0	5	0
