# Supplementary material for: Haploinsufficiency of the essential gene Rps12 causes defects in erythropoiesis and hematopoietic stem cell maintenance
Source: eLife. 2023 Jun 5;12:e69322. doi: 10.7554/eLife.69322 (PMC10287158; doi:10.7554/eLife.69322)
Supplement: Figure 4—source data 1. [file elife-69322-fig4-data1.xlsx]

## Sheet: F 4B
	Weeks post IR	Control	KO/+
	20	0
	20	0			0= alive
	20	0			1=dead
	20	0
	20	0
	20	0
	20	0
	20	0
	20	0
	20	0
	20		0
	20		0
	20		0
	20		0
	20		0
	4.14286		1
	4.14286		1
	4.28571		1
	4.28571		1
	6		1
	20	0
	20	0
	20	0
	20	0
	20	0
	20	0
	20	0
	20	0
	20	0
	20	0
	20		0
	20		0
	20		0
	20		0
	20		0
	20		0
	20		0
	20		0
	20		0
	18.1429		1

## Sheet: F 4C
		Number of transplanted mice
		Reconstituted	Non reconstituted
	Flox/Flox	20	0
	KO/+	11	9

## Sheet: F 4D
	wks post transpl	Flox/Flox			KO/+
		mean	SEM	N	mean	SEM	N
	4	78.67	1.802	10	60.07	6.532	10
	8	93.09	0.5214	10	78.19	6.387	10
	12	94.14	0.5119	10	80.4	6.652	10
	16	91.75	1.026	10	79.25	7.001	10
	20	95.29	0.8251	10	89.27	2.544	9

## Sheet: F 4E
	wks post transpl	Flox/Flox			KO/+
		mean	SEM	N	mean	SEM	N
	4	96.1	1.396	10	81.54	7.53	10
	8	95.55	1.94	10	76.79	10.55	10
	12	94.72	1.891	10	82.61	7.838	10
	16	93.11	2.3	10	82.51	7.642	10
	20	94.54	2.388	10	89.43	4.379	9

## Sheet: F 4F
	wks post transpl	Flox/Flox			KO/+
		mean	SEM	N	mean	SEM	N
	4	94.88	1.757	10	87.58	3.871	10
	8	98.04	0.2945	10	84.27	5.715	10
	12	98.85	0.3387	10	82.8	7.756	10
	16	97.84	0.537	10	82.48	7.584	10
	20	98.46	0.2202	10	89.44	5.184	9

## Sheet: F 4G
	wks post transpl	Flox/Flox			KO/+
		mean	SEM	N	mean	SEM	N
	4	16.15	2.607	10	5	1.361	10
	8	73.76	1.679	10	59.2	3.963	10
	12	82.18	1.169	10	71.33	3.979	10
	16	84.01	1.072	10	70.39	4.687	10
	20	88	0.6818	10	80.24	1.847	9

## Sheet: F 4I
	%CD45.2 of total Bone Marrow
	Flox/+	KO/+
	47	0.55
	47.5	0.37
	32.4	0.5
	23	0.38
	21.6	0.27
	10.3	0.33
	18.6	0.28
	32.5	0.26
	40.5	0.28
	6.13	0.21

## Sheet: F 4J
	%CD45.2 of total HSCs
	Flox/+	KO/+
	54.3	0
	63.2	0
	30.8	1.47
	40	0
	29.8	0
	7.37	0.49
	57.9	1.75
	80.3	0
	44.1	0.78
	3.88	0

## Sheet: F 4K
	wks post transpl	Flox/+			KO/+
		mean	SEM	N	mean	SEM	N
	8	35.3	2.93	10	0.505	0.1956	10
	12	38.74	3.761	10	1.658	0.9418	10
	16	42.41	4.7	10	0.1187	0.03556	10
	20	46.64	5.621	10	0.1905	0.05329	10

## Sheet: F 4L
	wks post transpl	Flox/+			KO/+
		mean	SEM	N	mean	SEM	N
	8	46.86	4.205	10	0.016	0.016	10
	12	46.33	6.846	10	0	0	10
	16	44.32	7.844	10	0	0	10
	20	43.67	8.098	10	0	0	10

[truncated: 2 more sheets: F 4M, F 4N]
