# Supplementary material for: Haploinsufficiency of the essential gene Rps12 causes defects in erythropoiesis and hematopoietic stem cell maintenance
Source: eLife. 2023 Jun 5;12:e69322. doi: 10.7554/eLife.69322 (PMC10287158; doi:10.7554/eLife.69322)
Supplement: Figure 5—source data 1. [file elife-69322-fig5-data1.xlsx]

## Sheet: F 5B
	Fetal Liver cells/Embryo Weight
	+/+	KO/+
	46880	40180.2
	44306.9	69652.8
	61832.1	38505.2
	47542.4	32916.7
	60930.2	46688
	58911.3	56912.9
	47413.8	39236.1
	56854.8	36796.9
	25173.3

## Sheet: F 5D
			+/+								KO/+
	% of Fetal Liver singlets	I	9.06	7.2	5.15	6.16	6.42	6.42	6.85	5.97	7.37	6.84	6.59	6.07
		II	12.7	8.29	8.47	10.2	8.53	7.07	12.3	11.1	8.07	8.42	9.66	11
		III	68.4	70.4	72	70.4	67.5	73.7	74.4	73.5	73	65.4	75.3	77.2
		IV	3.57	9.21	9.52	8.99	12.6	8.09	3.67	6.31	6.23	12.8	5.04	3.39

## Sheet: F 5F
	LT-HSC %
	+/+	KO/+
	0.331433	0.78695
	0.423094	0.174835
	0.225296	0.524973
	0.181057	0.780392
	0.429022
	0.533784
	0.437675
	0.568298

## Sheet: F 5G
	LT-HSC %
	+/+	KO/+
	0.344745	0.48069
	0.513005	0.944302
	0.428261	0.944334
	0.492511	1.42449
	0.788609
	0.727339
	1.10827
	0.858077

## Sheet: F 5H
			+/+								KO/+
	% of Lin- populations	MPPs	4.24067	6.04406	3.57174	3.62048	4.81143	6.0531	6.8938	5.88891	6.4858	6.9473	4.96716	5.23581
		CMP	3.33152	4.35091	4.04881	3.61344	4.87702	5.07038	6.07084	3.63142	5.30705	3.35357	5.44074	3.37563
		GMP	3.07747	4.10712	4.26344	4.50044	4.68852	5.75716	6.77354	3.7126	2.82309	5.31903	5.36855	5.14185
		MEP	22.2861	24.7005	30.153	27.8941	35.9605	33.9177	35.1559	34.9106	22.0447	5.72249	29.3532	37.1591
