# Supplementary material for: Haploinsufficiency of the essential gene Rps12 causes defects in erythropoiesis and hematopoietic stem cell maintenance
Source: eLife. 2023 Jun 5;12:e69322. doi: 10.7554/eLife.69322 (PMC10287158; doi:10.7554/eLife.69322)
Supplement: Figure 6—source data 1. [file elife-69322-fig6-data1.xlsx]

## Sheet: F 6B
			G0				G1				S/G2/M
	HSC	+/+	63.7	82.3	82.3	67.6	18.4	14	13.2	24.6	6.37	1.57	2.11	4.72
		KO/+	23.3	13.8	25.5		44.4	51.7	46.8		27.8	24.1	19.1
			G0				G1				S/G2/M
	MPP2/3	+/+	46.5	60.3	66	50.2	31.7	28.3	21.5	36	18.2	9.08	8.82	10.9
		KO/+	20.6	19.9	11.7		50.5	56.7	49.6		25.2	19.2	32
			G0				G1				S/G2/M
	MPP4	+/+	56.1	59.1	53	57.2	16.6	20.9	21	21.1	23.8	16.3	21.8	16.6
		KO/+	10.3	5.97	2.69		29.2	33.1	35.3		56.1	58.2	57.6
			G0				G1				S/G2/M
	MPROG	+/+	65	54.9	59.8	39.5	16.8	20.7	15.7	33.1	12.5	20.5	20.5	22.8
		KO/+	20.5	10.4	7.23		44	44.5	35.5		31.4	40.4	51.4
			G0				G1				S/G2/M
	CLP	+/+	34.4	48.9	23.2	51.1	3.46	7.74	17.8	7.69	60.6	42.7	57.6	40.2
		KO/+	10.8	4.16	13.1		5.23	8.92	8.08		83.3	85.1	78.4

## Sheet: F 6D
			+/+				KO/+
	Median OPP Intensity	HSC	483000	312190	303241	350706	575000	678000	609000
		MPP2	319849	264755	295980	255923	384539	416000	390172
		MPP3	564000	456000	460000	467000	592000	627000	581000
		MPP4	512000	347322	375331	359309	652000	729000	681000

## Sheet: F 6E
			+/+				KO/+
	Median OPP Intensity	CMP	495000	362810	410000	357572	410000	456000	440000
		GMP	545000	465000	492000	460000	522000	567000	540000
		MEP	481000	416000	430000	412000	583000	662000	634000
		CLP	646000	471000	424000	532000	537000	705000	592000

## Sheet: F6 H
	% AnexinV+ / PI-
	+/+	KO/+
	1.16	5.65
	3.12	8.59
	4.12	17.8
	1.7

## Sheet: F6I
	% AnexinV+ / PI-
	+/+	KO/+
	0.29	0.94
	0.96	1.57
	1.08	3.41
	0.39
