# Supplementary material for: Haploinsufficiency of the essential gene Rps12 causes defects in erythropoiesis and hematopoietic stem cell maintenance
Source: eLife. 2023 Jun 5;12:e69322. doi: 10.7554/eLife.69322 (PMC10287158; doi:10.7554/eLife.69322)
Supplement: Figure 7—source data 2. [file elife-69322-fig7-data2.xlsx]

## Sheet: F 7A
	LSK pAKT Geometric MFI
	+/+		KO/+
	NT	+SCF	NT	+SCF
	6435	9533	25592	30872
	6375	9496	29242	35971
	731	4415	26915	30274
	2754	5276	28300	31850
	5117	4817	31982	30346
	6332	14290	31183	30863

## Sheet: F 7B
	LSK pS6 Geometric MFI
	+/+		KO/+
	NT	+SCF	NT	+SCF
	27108	38503	83926	90457
	16585	32708	79186	91842
	3943	35813	73793	86651
	11784	31442	70769	86791
	20894	36617	82676	92320
	26029	42624	82391	95483

## Sheet: F 7C
	LSK p4EBP1 Geometric MFI
	+/+		KO/+
	NT	+SCF	NT	+SCF
	80496	56244	78116	109592
	74815	65521	149713	166869
	85121	78161	167479	133754
	82562	80994	146040	147584
	29596	54510	176149	134500
	76146	75161	132755	125210

## Sheet: F 7D
	MPROG pAKT Geometric MFI
	+/+		KO/+
	NT	+SCF	NT	+SCF
	42699	47385	38605	42955
	43581	47834	42015	46738
	46189	46330	43145	48452
	48057	52411	45012	43787
	44967	46610	45739	43114
	44404	52064	43797	42912

## Sheet: F 7E
	MPROG pS6 Geometric MFI
	+/+		KO/+
	NT	+SCF	NT	+SCF
	13568	21864	10402	17840
	8655	18847	4694	14235
	4913	16970	8839	21803
	420	16955	8519	18031
	8670	21155	9073	17345
	16337	23589	8069	15338

## Sheet: F 7F
	MPROG p4EBP1 Geometric MFI
	+/+		KO/+
	NT	+SCF	NT	+SCF
	294880	226657	268246	230278
	278873	246226	318324	276893
	276440	259139	312376	226518
	256426	236350	322301	265901
	200477	244872	311498	262807
	272218	250654	290261	229324

## Sheet: F 7G
	LSK pERK1 Geometric MFI
	+/+		KO/+
	NT	+SCF	NT	+SCF
	33645	31881	66700	74213
	22712	27488	83140	93740
	17945	17180	80544	74077
	6345	9753	81651	87809
	20275	20979	82888	79602
	18393	19140	85193	77436

## Sheet: F 7H
	MPROG pERK1 Geometric MFI
	+/+		KO/+
	NT	+SCF	NT	+SCF
	4790	8558	16594	17588
	3350	6648	14413	14152
	3694	4208	16019	15185
	717	1746	15993	15683
	6087	6713	16975	14628
	4894	3205	17789	15474

## Sheet: F 7I
	p-eIF2a/total eIF2a
	+/+	KO/+
	1.0154	0.697188
	1.30248	0.427465
	0.779152	0.246143
	1.02537	0.745221
