# Supplementary material for: Haploinsufficiency of the essential gene Rps12 causes defects in erythropoiesis and hematopoietic stem cell maintenance
Source: eLife. 2023 Jun 5;12:e69322. doi: 10.7554/eLife.69322 (PMC10287158; doi:10.7554/eLife.69322)
Supplement: Figure 8—figure supplement 1—source data 1. [file elife-69322-fig8-figsupp1-data1.xlsx]

## Sheet: Supl F4 A
	WBC			Hb			PLT
	CNTRL	Rps12 flox/+		CNTRL	Rps12 flox/+		CNTRL	Rps12 flox/+
	6.24	10.02		12.5	15.6		772	785
	7.94	11.56		11.8	13.5		716	793
	8.78	10.54		13.2	12.3		638	659
	8.26	12.92		14.1	14.1		128	692
	10.56	6.5		13.2	13		824	801

## Sheet: Supl F4 B left
	Cells/femur
	CNTRL	Rps12 flox/+
	11.1	23.45
	19.4	16.2
	12.1	12.8
	17.55	11.85
	18.75	18.25

## Sheet: Supl F4 B right
		CNTRL					Rps12 flox/+
	MPROG	168000	308000	147000	239000	279000	175000	59800	151000	111000	228000
	LSK	43900	71200	52900	81000	71700	63600	15000	59400	32700	58100
	MPP3,2	14600	19400	18400	30500	33200	24700	5280	27200	15900	23200
	HSCs	7720	11800	7350	14600	13200	15500	2800	7880	6550	12200

## Sheet: Supl F4C
			CNTRL					Rps12 flox/+
	Median OPP Intensity	MPROG	331620	152394	219295	360930	499000	271673	338303	274238	238394	329910
		LSK	157937	62957	100820	189555	279610	123803	173059	130754	110159	152574
		MPP3,2	147900	65860	103040	177208	211087	123963	170746	132479	113624	149945
		HSCs	109742	50142	74161	135803	163966	88982	129682	89628	85599	110447

## Sheet: Supl F4D
			G0				G1				G2,S,M
	MPROG	CNTRL	12.7	29.2	16.9	22.6	10.1	50.1	7.99	41.4	70.7	12.3	68.5	27.6
		Rps12 flox/+	24.9	19.5	16.2	7.71	43.6	32.9	33.1	2.03	23.1	39.7	45.7	86.1
			G0				G1				G2,S,M
	LSK	CNTRL	88.4	78.4	70.9	82.2	4.59	8.16	7.91	3.14	4.27	7.54	16.1	11.5
		Rps12 flox/+	76.3	56	56.7	79	5.18	8.35	5.57	3.12	15.8	32.6	34	9.38
			G0				G1				G2,S,M
	MPP3,2	CNTRL	47.5	65.6	41.6	64.3	4.1	19.4	3.96	10.7	44.7	10	49.1	21.3
		Rps12 flox/+	57.7	42.6	40.3	24.7	16.8	14.2	12.8	1.03	21	38.9	44.3	68.9
			G0				G1				G2,S,M
	HSC	CNTRL	84.7	88.1	77.9	80.1	6.67	2.29	4.34	4.39	5.2	7.63	15.2	13.2
		Rps12 flox/+	74.7	62.5	61.2	82.1	7.35	3.63	5.79	1.23	16.2	30.8	30.9	9.84

## Sheet: Supl F4E
			CNTRL					Rps12 flox/+
	Median OPP Intensity	MPROG	196377	208392	183310	131615	169010	150489	156289	170852	166332	179567
		LSK	118763	102205	92644	61286	92548	79035	82953	88413	101007	112848
		MPP3,2	128866	103642	90253	62871	101028	89939	85652	87792	106746	120588
		HSCs	71680	83815	69928	44552	66773	58810	65488	67304	67423	66693
