# Supplementary material for: Haploinsufficiency of the essential gene Rps12 causes defects in erythropoiesis and hematopoietic stem cell maintenance
Source: eLife. 2023 Jun 5;12:e69322. doi: 10.7554/eLife.69322 (PMC10287158; doi:10.7554/eLife.69322)
Supplement: Figure 8—source data 1. [file elife-69322-fig8-data1.xlsx]

## Sheet: F 8B
	WBC			Hb			PLT
	CNTRL	Rps12 flox/+		CNTRL	Rps12 flox/+		CNTRL	Rps12 flox/+
	5.08	6.86		10	14.3		327	747
	11.22	8.34		14.6	14		606	700
	10.08	12.02		14.3	13.06		809	507
	8.62	11.44		15.2	14.6		732	691
	7.02	3.22		14.3	8.1		697	335

## Sheet: F 8C
	Cells/femur
	CNTRL	Rps12 flox/+				CNTRL				Rps12 flox/+
	18.6	21			MPROG	267000	404000	398000	268000	333000	227000	143000	284000
	18.8	15.9			LSK	64400	88300	86600	64800	91600	42500	31500	45800
	17.3	12.8			MPP3,2	15000	16300	16200	25000	43700	12200	9630	15500
	13.6	14.3			HSCs	11400	12300	12400	13100	16300	6570	6630	8290

## Sheet: F 8D
			CNTRL					Rps12 flox/+
	Median OPP Intensity	MPROG	208311	210368	130977	133101	149505	186880	121327	109446	111655	98380
		LSK	103287	103168	88342	61065	95197	67798	52964	53940	54565	46382
		MPP3,2	95977	103084	80556	65732	81005	78389	57177	53669	51951	49924
		HSCs	69501	77396	62095	49581	59643	45679	43288	40459	28647	33566

## Sheet: F 8E
	WBC			Hb			PLT
	CNTRL	Rps12 flox/+		CNTRL	Rps12 flox/+		CNTRL	Rps12 flox/+
	10.44	7.5		14.3	13.8		874	750
	10.78	8.82		14	12.8		914	587
	9.26	9.38		14.5	12.5		917	707
	10.16	6.26		14.2	12.7		716	725
		8.62			14.3			710

## Sheet: F 8F
	Cells/femur
	CNTRL	Rps12 flox/+				CNTRL					Rps12 flox/+
	19.5	11.3			MPROG	440014	206700	585663	459688	374057	436268	238701	237760	343418	248473
	15	14.8			LSK	74926	24525	70649	53946	48062	34776	23109	32538	39420	33964
	15.1	12.8			MPP3,2	35802	4155	29367	19795	19174	9884	6769	15296	21849	16709
	18.5	12.4			HSCs	23888	14205	22250	26474	16973	16996	11865	9114	10689	9127
	14.2	14
