# Supplementary material for: Haploinsufficiency of the essential gene Rps12 causes defects in erythropoiesis and hematopoietic stem cell maintenance
Source: eLife journal article supplement (doi:10.7554/elife.69322), 2023-06-05
Supplement: supp [file elife-69322-supp-v1.zip]



WT



KO/+

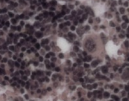

KO/+

**LT-HSC**

ns

% of parent population

+/+ KO/+

**ST-HSC**

ns

% of parent population

+/+ KO/+

**Progenitors**

% of parent population

MPP2 MPP3 MPP4 CMP GMP MEP CLP

● +/+ ● KO/+

\* \*\* \*

**LT-HSC**

ns

% of parent population

+/+ KO/+

**ST-HSC**

\*\*\*

% of parent population

+/+ KO/+

**Progenitors**

● +/+  
● KO/+

100  
80  
60  
40  
20  
0

MPP2 MPP3 MPP4 CMP GMP MEP CLP

\* \*\* \*
