# Supplementary material for: Haploinsufficiency of the essential gene Rps12 causes defects in erythropoiesis and hematopoietic stem cell maintenance
Source: eLife. 2023 Jun 5;12:e69322. doi: 10.7554/eLife.69322 (PMC10287158; doi:10.7554/eLife.69322)
Supplement: Supplementary file 1. — This file contains a list of all the biotinylated and fluorochrome-conjugated antibodies used in both live and fixed cell samples used in the experiments described in this paper. The antibodies are grouped by flow cytometry panel and include clone name as well as the manufacturer and catalog number information for ease of use and reproducibility. Additional information on antibody concentration used for staining can be found in the ‘Key Resources Table.’ [file elife-69322-supp1.xlsx]

## Sheet: Sheet1
	Supplementary Table 1
		Antibodies	Clone	Source	Catalog Number
Peripheral blood flow
	Peripheral blood after Transplant	CD16/CD32	Clone 2.4G2	BD biosciences	553142
		Gr1 APC Cy7	RB6-8C5	BD biosciences	557661
		Mac1 PE	M1/70	BioLegend	101208
		B220 A700	RA3-6B2	BD biosciences	557957
		Thy1.2 APC	53-2.1	BD biosciences	553007
		CD45.1 FITC	A20	BD Biosciences	553775
		CD45.2 PE/Dazzle	104	BioLegend	109845
Bone marrow flow on live cells
Bone marrow after Transplant	Biotinylated lineage coctail	CD3e	145-2C11	eBioscience	13003182
		CD4	GK1.5	eBioscience	13004182
		CD8a	53-6.7	eBioscience	13008182
		Gr.1	RB68C5	eBioscience	13593182
		B220	RA3-6B2	eBioscience	13045282
		CD19	MB 19-1	eBioscience	13019182
		Ter119	TER119	eBioscience	13592182
	Conjugated	Sca1 PE-Cy7	D7	BioLegend	108114
		cKit APC	2B8	BD Biosciences	553356
		FCRg PE	93	Thermofisher	12-0161-82
		CD34e eF450	RAM34	Thermofisher	48-0341-80
		CD150 BV421	Q38-480	BD Biosciences	562811
		CD48 Alx700	HM48-1	BioLegend	103426
		Flk2-PE-Cy5	A2F10	BioLegend	135312
		CD45.2 BV605	104	BioLegend	109841
		CD45.1 FITC	A20	BD Biosciences	553775
		IL7R PerCP Cy5.5	A7R34	BioLegend	135021
		Streptavidin-APC-Cy7		BD Biosciences	554063
Bone marrow flow on fixed cells
Before fixation	Biotinylated lineage coctail	CD3e	145-2C11	eBioscience	13003182
		CD4	GK1.5	eBioscience	13004182
		CD8a	53-6.7	eBioscience	13008182
		Gr.1	RB68C5	eBioscience	13593182
		B220	RA3-6B2	eBioscience	13045282
		CD19	MB 19-1	eBioscience	13019182
		Ter119	TER-119	eBioscience	13592182
	Conjugated	Sca1 PE-Cy7	D7	eBioscience	25598182
		cKit APC	2B8	BD Biosciences	553356
		CD150 BV421	Q38-480	BD Biosciences	562811
		CD48 Alx700	HM48-1	BD Biosciences	560731
		Flk2-PE	A2F10	BioLegend	135306
		IL7R PerCP-Cy5.5	A7R34	BioLegend	135021
		Streptavidin-APC-Cy7		BD Biosciences	554063
Post fixation	Apoptosis	FITC Annexin V		BD Biosciences	560931
		PI		BD Biosciences	556463
	p-Flow	pS6 (Ser235/236) Alexa 488	D57.2.2E	Cell Signaling	4803S
		pERK1(T202/Y204) Alexa 488	E10	Cell Signaling	4374
		pAkt (Ser473) AF647	193H12	Cell Signaling	2337
		p4E-BP1 (Thr37/46) AF647	236B4	Cell Signaling	5123
	Cell cycle	Ki-67 FITC	B56	BD Biosciences	556026
		Hoechst		BD Biosciences	561908
Bone marrow flow OPP
Before fixation	Biotinylated lineage coctail	CD3e	145-2C11	eBioscience	13003182
		CD4	GK1.5	eBioscience	13004182
		CD8a	53-6.7	eBioscience	13008182
		Gr.1	RB68C5	eBioscience	13593182
		B220	RA3-6B2	eBioscience	13045282
		CD19	MB 19-1	eBioscience	13019182
		Ter119	TER-119	eBioscience	13592182
		IL7R	eBioRDR5	eBioscience	13127882
	Conjugated	Sca1 PE-Cy7	D7	eBioscience	25598182
		cKit APC	2B8	BD Biosciences	553356
		FCRg PE	93	Thermofisher	12-0161-81
		CD34e eF450	RAM34	Thermofisher	48-0341-80
		CD150 BV421	Q38-480	BD Biosciences	562811
		CD48 Alx700	HM48-1	BD Biosciences	560731
		Flk2-PE Cy5	A2F10	BioLegend	135311
		IL7R PerCP-Cy5	A7R34	BioLegend	135021
		Streptavidin-APC-Cy7		BD Biosciences	554063
	Non Conjugated	OPP		Thermofisher	C10456
Post-fixation		Click-IT 488		Thermofisher	C10456
Bone marrow and spleen (non-lysed)
	Conjugated	CD16/CD32	Clone 2.4G2	BD biosciences	553142
		Ter119 APC	TER119	BioLegend	116211
		CD71 PE	C2	BD biosciences	561937
