# Supplementary figures and images for: Haploinsufficiency of the essential gene Rps12 causes defects in erythropoiesis and hematopoietic stem cell maintenance
Source: eLife journal article supplement (doi:10.7554/elife.69322), 2023-06-05

**A**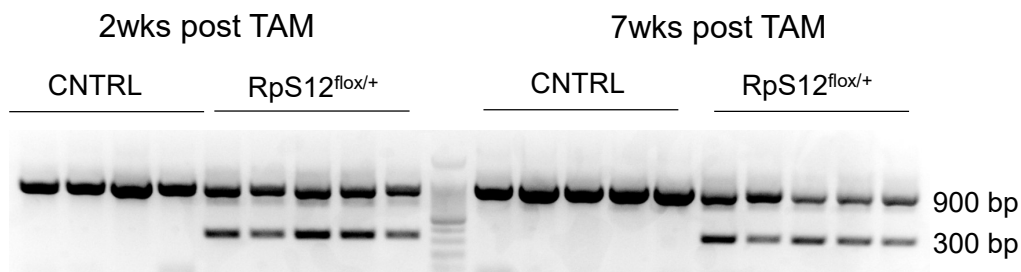**B**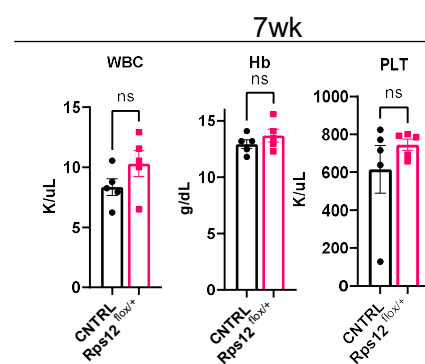**C**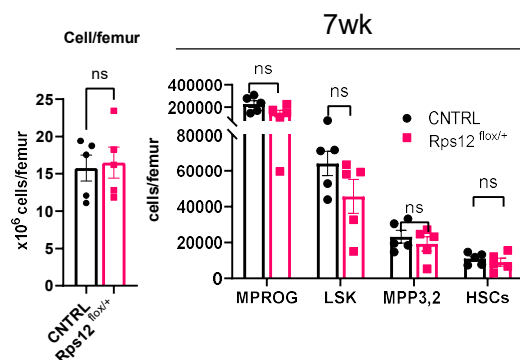**D**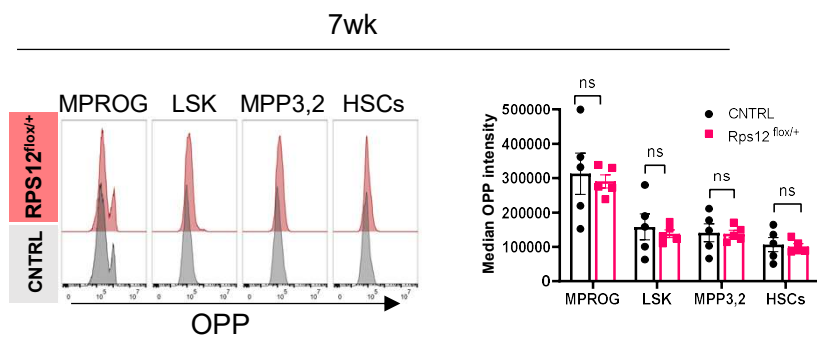**E**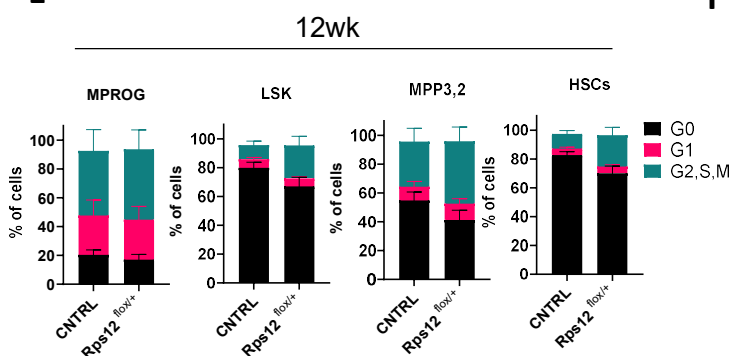**F**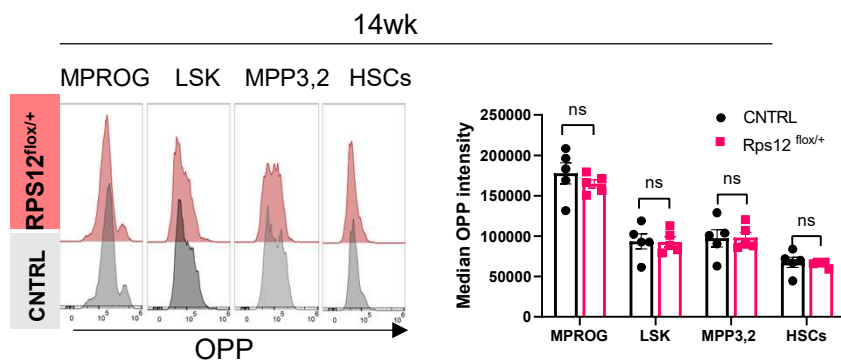

Supplement: supp [file elife-69322-supp-v1.zip]

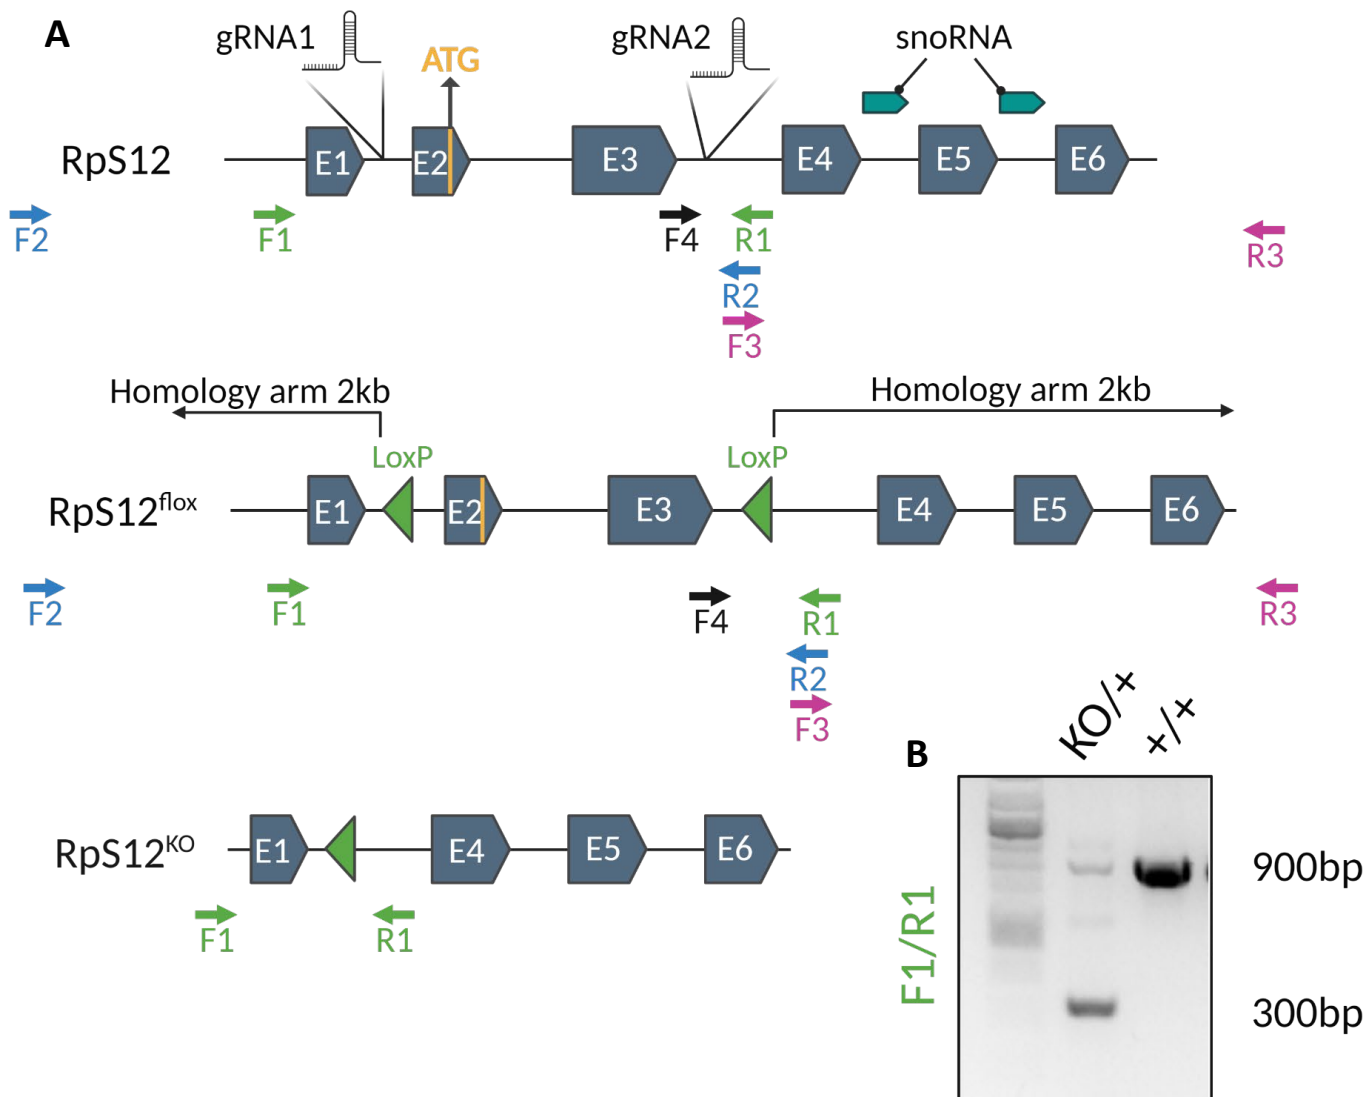

Supplement: supp [file elife-69322-supp-v1.zip]

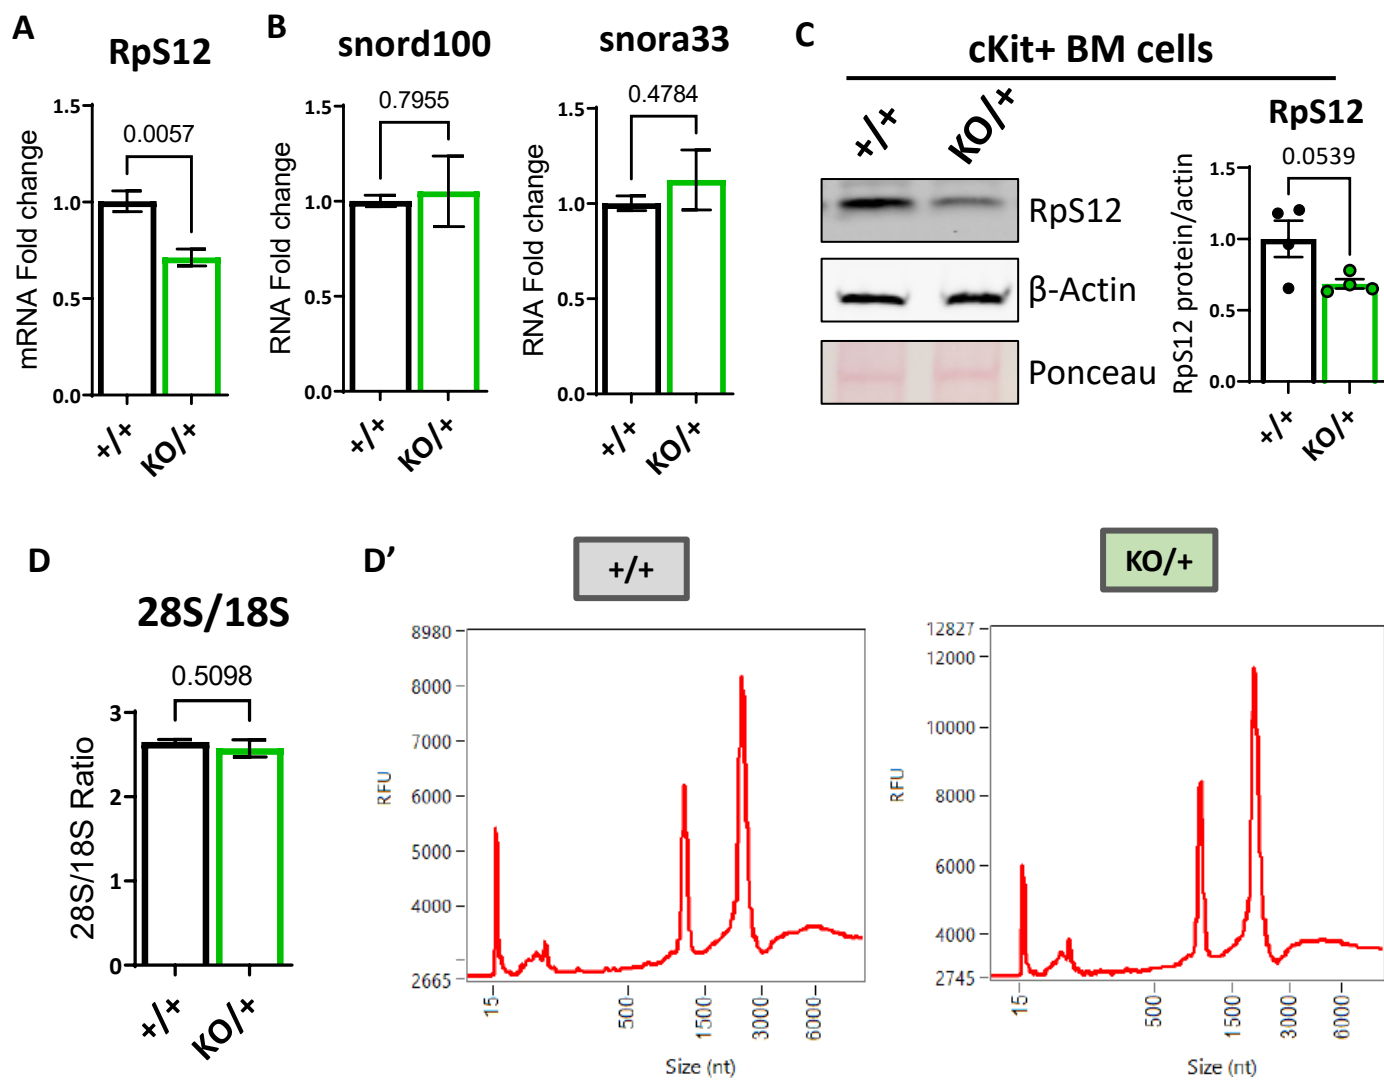

Supplement: supp [file elife-69322-supp-v1.zip]
